# Supplementary material for: The Influence of the pH and Salinity of Water in Breeding Sites on the Occurrence and Community Composition of Immature Mosquitoes in the Green Belt of the City of São Paulo, Brazil
Source: MDPI journal article supplement (doi:10.3390/insects12090797), 2021-09-05
Supplement: s1 [file s1]

# Supplementary information

**Table S1.** Number of mosquito species collected by breeding site in two remnants of Atlantic Forest in the city of São Paulo, Brazil.

| Area                  | Species                            | Artificial | Epiphytic<br>bromeliads | Ground<br>bromeliads | Bamboo hole | Lake     | Tree hollow | Bamboo<br>hollow | Rock | Ponds    | Total    |
|-----------------------|------------------------------------|------------|-------------------------|----------------------|-------------|----------|-------------|------------------|------|----------|----------|
| Cantareira State Park | <i>Ad. (Ady.) squamipennis</i>     | 0          | 0                       | 0                    | 0           | 0        | 0           | 0                | -    | 0        | 0        |
|                       | <i>Ae. (Grg.) fluviatilis</i>      | 0          | 0                       | 0                    | 0           | 0        | 0           | 0                | -    | 0        | 0        |
|                       | <i>Ae. (Och.) crinifer</i>         | 0          | 0                       | 0                    | 0           | 0        | 0           | 0                | -    | 20       | 20       |
|                       | <i>Ae. (Och.) nubilus</i>          | 0          | 0                       | 0                    | 0           | 0        | 0           | 0                | -    | 0        | 0        |
|                       | <i>Ae. (Och.) rhyacophilus</i>     | 0          | 0                       | 0                    | 0           | 0        | 0           | 0                | -    | 0        | 0        |
|                       | <i>Ae. (Och.) scapularis</i>       | 0          | 0                       | 0                    | 0           | 0        | 0           | 0                | -    | 0        | 0        |
|                       | <i>Ae. (Pro.) terrens</i>          | 0          | 0                       | 0                    | 0           | 0        | 0           | 0                | -    | 0        | 0        |
|                       | <i>Ae. (Stg.) aegypti</i>          | 35         | 0                       | 0                    | 0           | 0        | 0           | 22               | -    | 0        | 57       |
|                       | <i>Ae. (Stg.) albopictus</i>       | 31         | 4                       | 0                    | 0           | 0        | 0           | 7                | -    | 0        | 42       |
|                       | <b><i>An. (Ker.) bellator</i></b>  | <b>0</b>   | <b>1</b>                | <b>0</b>             | <b>0</b>    | <b>0</b> | <b>0</b>    | <b>0</b>         | -    | <b>0</b> | <b>1</b> |
|                       | <i>An. (Ker.) cruzii</i>           | 0          | 253                     | 4                    | 0           | 0        | 0           | 0                | -    | 0        | 257      |
|                       | <i>An. (Nys.) strodei</i>          | 4          | 0                       | 0                    | 0           | 10       | 0           | 0                | -    | 0        | 14       |
|                       | <i>Cx. (Car.) iridescens</i>       | 493        | 18                      | 0                    | 276         | 0        | 5           | 102              | -    | 10       | 904      |
|                       | <i>Cx. (Cux.) brami</i>            | 0          | 0                       | 0                    | 0           | 0        | 0           | 0                | -    | 87       | 87       |
|                       | <i>Cx. (Cux.) chidesteri</i>       | 0          | 0                       | 0                    | 0           | 0        | 0           | 0                | -    | 0        | 0        |
|                       | <i>Cx. (Cux.) coronator</i>        | 16         | 0                       | 0                    | 0           | 0        | 0           | 0                | -    | 0        | 16       |
|                       | <i>Cx. (Cux.) dolosus</i>          | 151        | 7                       | 0                    | 0           | 4        | 67          | 0                | -    | 347      | 576      |
|                       | <i>Cx. (Cux.) eduardoi</i>         | 45         | 0                       | 0                    | 0           | 0        | 6           | 0                | -    | 100      | 151      |
|                       | <i>Cx. (Cux.) lygrus</i>           | 0          | 0                       | 0                    | 0           | 0        | 0           | 0                | -    | 36       | 36       |
|                       | <i>Cx. (Cux.) mollis</i>           | 0          | 0                       | 0                    | 0           | 0        | 0           | 0                | -    | 2        | 2        |
|                       | <i>Cx. (Cux.) nigripalpus</i>      | 0          | 0                       | 0                    | 0           | 0        | 0           | 0                | -    | 2        | 2        |
|                       | <i>Cx. (Cux.) quinquefasciatus</i> | 0          | 0                       | 0                    | 0           | 0        | 0           | 0                | -    | 0        | 0        |
|                       | <b><i>Cx. (Cux.) restuans</i></b>  | <b>0</b>   | <b>0</b>                | <b>0</b>             | <b>0</b>    | <b>0</b> | <b>0</b>    | <b>0</b>         | -    | <b>3</b> | <b>3</b> |

|                                            |           |          |          |          |          |           |          |   |          |           |
|--------------------------------------------|-----------|----------|----------|----------|----------|-----------|----------|---|----------|-----------|
| <i>Cx. (Mcx.) albipes</i>                  | 4         | 135      | 2        | 0        | 0        | 0         | 0        | - | 0        | 141       |
| <i>Cx. (Mcx.)<br/>aphylactus</i>           | 0         | 0        | 0        | 0        | 0        | 0         | 0        | - | 0        | 0         |
| <i>Cx. (Mcx.) aureus</i>                   | 0         | 0        | 0        | 0        | 0        | 0         | 0        | - | 0        | 0         |
| <i>Cx. (Mcx.)<br/>daumasturus</i>          | 0         | 1        | 0        | 0        | 0        | 0         | 0        | - | 0        | 1         |
| <i>Cx. (Mcx.)<br/>dubitans</i>             | 0         | 19       | 0        | 0        | 0        | 0         | 0        | - | 0        | 19        |
| <i>Cx. (Mcx.)<br/>fuscatus</i>             | 0         | 5        | 0        | 0        | 0        | 0         | 0        | - | 0        | 5         |
| <i>Cx. (Mcx.)<br/>imitator</i>             | 3         | 297      | 10       | 2        | 0        | 0         | 0        | - | 0        | 312       |
| <i>Cx. (Mcx.)<br/>inimitabilis</i>         | 0         | 6        | 0        | 0        | 0        | 0         | 0        | - | 0        | 6         |
| <i>Cx. (Mcx.) lanei</i>                    | 0         | 32       | 0        | 0        | 0        | 0         | 0        | - | 0        | 32        |
| <i>Cx. (Mcx.)<br/>neglectus</i>            | 0         | 14       | 0        | 0        | 0        | 0         | 0        | - | 0        | 14        |
| <i>Cx. (Mcx.)<br/>pleuristriatus</i>       | 0         | 119      | 109      | 0        | 0        | 0         | 0        | - | 0        | 228       |
| <b><i>Cx. (Mcx.)<br/>reducens</i></b>      | <b>0</b>  | <b>5</b> | <b>0</b> | <b>0</b> | <b>0</b> | <b>0</b>  | <b>0</b> | - | <b>0</b> | <b>5</b>  |
| <i>Cx. (Mcx.)<br/>worontzowi</i>           | 0         | 151      | 0        | 0        | 0        | 0         | 0        | - | 0        | 151       |
| <i>Cx. (Mel.) akritos</i>                  | 0         | 0        | 0        | 0        | 0        | 0         | 0        | - | 0        | 0         |
| <i>Cx. (Mel.)<br/>bahiensis</i>            | 0         | 0        | 0        | 0        | 66       | 0         | 0        | - | 34       | 100       |
| <i>Cx. (Mel.)<br/>intrincatus</i>          | 4         | 3        | 0        | 0        | 23       | 0         | 0        | - | 5        | 35        |
| <i>Cx. (Mel.) pilosus</i>                  | 0         | 0        | 0        | 0        | 0        | 0         | 0        | - | 0        | 0         |
| <i>Cx. (Mel.)<br/>ribeirensis</i>          | 0         | 0        | 0        | 0        | 0        | 0         | 0        | - | 0        | 0         |
| <i>Cx. (Mel.) vaxus</i>                    | 0         | 0        | 0        | 0        | 212      | 0         | 0        | - | 0        | 212       |
| <i>Cx. ocellatus</i>                       | 0         | 43       | 0        | 8        | 0        | 0         | 0        | - | 0        | 51        |
| <b><i>Hg. (Con.)<br/>leucocelaenus</i></b> | <b>20</b> | <b>0</b> | <b>0</b> | <b>5</b> | <b>0</b> | <b>37</b> | <b>9</b> | - | <b>0</b> | <b>71</b> |
| <i>Li. durhami</i>                         | 877       | 0        | 0        | 0        | 0        | 0         | 0        | - | 0        | 877       |
| <i>Lu. (Lut.) bigoti</i>                   | 3         | 0        | 0        | 0        | 0        | 1         | 0        | - | 23       | 27        |
| <i>Ma. (Man.)<br/>indubitans</i>           | 0         | 0        | 0        | 0        | 0        | 0         | 0        | - | 0        | 0         |
| <i>Ps. (Jan.) albigena</i>                 | 0         | 0        | 0        | 0        | 0        | 0         | 0        | - | 0        | 0         |
| <i>Ps. (Jan.) ferox</i>                    | 0         | 0        | 0        | 0        | 0        | 0         | 0        | - | 3        | 3         |
| <b><i>Ru. (Run.)<br/>cerqueirai</i></b>    | <b>0</b>  | <b>0</b> | <b>0</b> | <b>7</b> | <b>0</b> | <b>0</b>  | <b>0</b> | - | <b>0</b> | <b>7</b>  |
| <i>Sa. (Sab.)<br/>purpureus</i>            | 0         | 0        | 0        | 0        | 0        | 3         | 0        | - | 0        | 3         |

|                                  |                                 |      |      |     |     |     |     |     |     |     |      |
|----------------------------------|---------------------------------|------|------|-----|-----|-----|-----|-----|-----|-----|------|
|                                  | <i>Sh. fluviatilis</i>          | 0    | 0    | 0   | 99  | 0   | 0   | 46  | -   | 0   | 145  |
|                                  | <i>Tr. pallidiventer</i>        | 2    | 0    | 0   | 23  | 0   | 0   | 3   | -   | 0   | 28   |
|                                  | <i>Tx. (Lyn.) portoricensis</i> | 0    | 0    | 0   | 0   | 0   | 0   | 0   | -   | 0   | 0    |
|                                  | <i>Tx. (Lyn.) theobaldi</i>     | 3    | 0    | 0   | 0   | 0   | 0   | 0   | -   | 0   | 3    |
|                                  | <i>Tx. tricophygyus</i>         | 0    | 3    | 0   | 0   | 0   | 0   | 0   | -   | 0   | 3    |
|                                  | <i>Ur. (Ura.) geometrica</i>    | 0    | 0    | 0   | 0   | 1   | 0   | 0   | -   | 0   | 1    |
|                                  | <i>Ur. (Ura.) lowii</i>         | 0    | 0    | 0   | 0   | 1   | 0   | 0   | -   | 0   | 1    |
|                                  | <i>Ur. (Ura.) pulcherrima</i>   | 0    | 0    | 0   | 0   | 0   | 0   | 0   | -   | 0   | 0    |
|                                  | <i>Wy. (Mim.) oblita</i>        | 0    | 0    | 0   | 5   | 0   | 0   | 0   | -   | 0   | 5    |
|                                  | <i>Wy. (Pho.) davisi</i>        | 0    | 117  | 4   | 0   | 0   | 0   | 0   | -   | 0   | 121  |
|                                  | <i>Wy. (Pho.) edwardsi</i>      | 0    | 24   | 0   | 0   | 0   | 0   | 0   | -   | 0   | 24   |
|                                  | <i>Wy. (Pho.) incaudata</i>     | 0    | 0    | 0   | 0   | 0   | 0   | 0   | -   | 0   | 0    |
|                                  | <i>Wy. (Pho.) pallidoventer</i> | 0    | 58   | 3   | 0   | 0   | 0   | 0   | -   | 0   | 61   |
|                                  | <i>Wy. (Pho.) palmata</i>       | 0    | 3    | 0   | 0   | 0   | 0   | 0   | -   | 0   | 3    |
|                                  | <i>Wy. (Pho.) pilicauda</i>     | 0    | 0    | 0   | 0   | 0   | 0   | 0   | -   | 0   | 0    |
|                                  | <i>Wy. (Pho.) splendida</i>     | 0    | 0    | 0   | 0   | 0   | 0   | 0   | -   | 0   | 0    |
|                                  | <i>Wy. (Pho.) theobaldi</i>     | 3    | 192  | 9   | 0   | 0   | 0   | 0   | -   | 0   | 204  |
|                                  | <i>Wy. (Spi.) airosai</i>       | 0    | 1    | 0   | 0   | 0   | 0   | 0   | -   | 0   | 1    |
|                                  | <i>Wy. (Wyo.) lutzi</i>         | 0    | 0    | 0   | 9   | 0   | 0   | 0   | -   | 0   | 9    |
|                                  | <i>Wy. aporonoma</i>            | 0    | 0    | 0   | 0   | 0   | 0   | 0   | -   | 0   | 0    |
|                                  | <i>Wy. personata</i>            | 0    | 0    | 0   | 4   | 0   | 0   | 0   | -   | 0   | 4    |
|                                  | <i>Wy. serratoria</i>           | 0    | 0    | 0   | 0   | 0   | 0   | 0   | -   | 0   | 0    |
|                                  | <i>Total</i>                    | 1694 | 1511 | 141 | 438 | 317 | 119 | 189 | 0   | 672 | 5081 |
| Capivari-Monos conservation area | <i>Ad. (Ady.) squamipennis</i>  | 0    | 0    | 0   | -   | 1   | -   | 0   | 0   | 0   | 1    |
|                                  | <i>Ae. (Grg.) fluviatilis</i>   | 229  | 0    | 0   | -   | 5   | -   | 0   | 9   | 0   | 243  |
|                                  | <i>Ae. (Och.) crinifer</i>      | 6    | 0    | 0   | -   | 47  | -   | 0   | 0   | 73  | 126  |
|                                  | <i>Ae. (Och.) nubilus</i>       | 0    | 0    | 0   | -   | 0   | -   | 0   | 0   | 6   | 6    |
|                                  | <i>Ae. (Och.) rhyacophilus</i>  | 42   | 0    | 0   | -   | 0   | -   | 0   | 145 | 0   | 187  |

|                                           |            |          |          |          |          |          |          |           |          |            |
|-------------------------------------------|------------|----------|----------|----------|----------|----------|----------|-----------|----------|------------|
| <i>Ae. (Och.) scapularis</i>              | 20         | 0        | 0        | -        | 5        | -        | 0        | 12        | 37       | 74         |
| <i>Ae. (Pro.) terreus</i>                 | 0          | 0        | 0        | -        | 0        | -        | 3        | 0         | 0        | 3          |
| <i>Ae. (Stg.) aegypti</i>                 | 12         | 0        | 0        | -        | 0        | -        | 0        | 0         | 0        | 12         |
| <i>Ae. (Stg.) albopictus</i>              | 73         | 2        | 0        | -        | 0        | -        | 26       | 0         | 0        | 101        |
| <i>An. (Ker.) bellator</i>                | 0          | 0        | 0        | -        | 0        | -        | 0        | 0         | 0        | 0          |
| <i>An. (Ker.) cruzii</i>                  | 0          | 108      | 12       | -        | 0        | -        | 0        | 0         | 0        | 120        |
| <i>An. (Nys.) strodei</i>                 | 0          | 0        | 0        | -        | 183      | -        | 0        | 0         | 12       | 195        |
| <i>Cx. (Car.) iridescens</i>              | 37         | 0        | 0        | -        | 0        | -        | 31       | 0         | 0        | 68         |
| <i>Cx. (Cux.) brami</i>                   | 7          | 0        | 0        | -        | 6        | -        | 0        | 0         | 13       | 26         |
| <b><i>Cx. (Cux.) chidesteri</i></b>       | <b>0</b>   | <b>0</b> | <b>0</b> | <b>-</b> | <b>3</b> | <b>-</b> | <b>0</b> | <b>0</b>  | <b>0</b> | <b>3</b>   |
| <i>Cx. (Cux.) coronator</i>               | 104        | 0        | 0        | -        | 7        | -        | 0        | 8         | 111      | 230        |
| <i>Cx. (Cux.) dolosus</i>                 | 307        | 0        | 0        | -        | 53       | -        | 0        | 77        | 7        | 444        |
| <i>Cx. (Cux.) eduardoi</i>                | 75         | 0        | 3        | -        | 40       | -        | 0        | 3         | 9        | 130        |
| <i>Cx. (Cux.) lygrus</i>                  | 0          | 0        | 0        | -        | 4        | -        | 0        | 0         | 2        | 6          |
| <i>Cx. (Cux.) mollis</i>                  | 15         | 0        | 0        | -        | 7        | -        | 0        | 9         | 0        | 31         |
| <i>Cx. (Cux.) nigripalpus</i>             | 0          | 0        | 0        | -        | 0        | -        | 0        | 0         | 6        | 6          |
| <b><i>Cx. (Cux.) quinquefasciatus</i></b> | <b>171</b> | <b>4</b> | <b>0</b> | <b>-</b> | <b>0</b> | <b>-</b> | <b>0</b> | <b>14</b> | <b>9</b> | <b>198</b> |
| <i>Cx. (Cux.) restuans</i>                | 0          | 0        | 0        | -        | 0        | -        | 0        | 0         | 0        | 0          |
| <i>Cx. (Mcx.) albipes</i>                 | 8          | 89       | 35       | -        | 0        | -        | 18       | 0         | 0        | 150        |
| <b><i>Cx. (Mcx.) aphyllactus</i></b>      | <b>0</b>   | <b>0</b> | <b>3</b> | <b>-</b> | <b>0</b> | <b>-</b> | <b>0</b> | <b>0</b>  | <b>0</b> | <b>3</b>   |
| <b><i>Cx. (Mcx.) aureus</i></b>           | <b>9</b>   | <b>0</b> | <b>0</b> | <b>-</b> | <b>0</b> | <b>-</b> | <b>0</b> | <b>0</b>  | <b>0</b> | <b>9</b>   |
| <i>Cx. (Mcx.) daumasturus</i>             | 0          | 6        | 0        | -        | 0        | -        | 0        | 0         | 0        | 6          |
| <i>Cx. (Mcx.) dubitans</i>                | 0          | 38       | 6        | -        | 0        | -        | 0        | 0         | 0        | 44         |
| <i>Cx. (Mcx.) fuscatus</i>                | 0          | 21       | 1        | -        | 0        | -        | 0        | 0         | 0        | 22         |
| <i>Cx. (Mcx.) imitator</i>                | 0          | 180      | 31       | -        | 0        | -        | 0        | 0         | 0        | 211        |
| <i>Cx. (Mcx.) inimitabilis</i>            | 0          | 5        | 2        | -        | 0        | -        | 0        | 0         | 0        | 7          |
| <i>Cx. (Mcx.) lanei</i>                   | 0          | 2        | 0        | -        | 0        | -        | 0        | 0         | 0        | 2          |

|                                        |          |          |          |          |           |          |          |          |           |           |
|----------------------------------------|----------|----------|----------|----------|-----------|----------|----------|----------|-----------|-----------|
| <i>Cx. (Mcx.) neglectus</i>            | 0        | 45       | 5        | -        | 0         | -        | 0        | 0        | 0         | <b>50</b> |
| <i>Cx. (Mcx.) pleuristriatus</i>       | 85       | 144      | 180      | -        | 0         | -        | 8        | 0        | 0         | 417       |
| <i>Cx. (Mcx.) reducens</i>             | 0        | 0        | 0        |          | 0         | -        | 0        | 0        | 0         | 0         |
| <i>Cx. (Mcx.) worontzowi</i>           | 0        | 57       | 0        | -        | 0         | -        | 0        | 0        | 0         | 57        |
| <b><i>Cx. (Mel.) akritos</i></b>       | <b>1</b> | <b>0</b> | <b>0</b> | <b>-</b> | <b>0</b>  | <b>-</b> | <b>0</b> | <b>0</b> | <b>0</b>  | <b>1</b>  |
| <i>Cx. (Mel.) bahiensis</i>            | 0        | 0        | 0        | -        | 2         | -        | 0        | 0        | 6         | 8         |
| <i>Cx. (Mel.) intricatus</i>           | 0        | 0        | 0        | -        | 2         | -        | 0        | 0        | 14        | 16        |
| <b><i>Cx. (Mel.) pilosus</i></b>       | <b>1</b> | <b>0</b> | <b>0</b> | <b>-</b> | <b>14</b> | <b>-</b> | <b>0</b> | <b>0</b> | <b>20</b> | <b>35</b> |
| <b><i>Cx. (Mel.) ribeirensis</i></b>   | <b>0</b> | <b>0</b> | <b>0</b> | <b>-</b> | <b>8</b>  | <b>-</b> | <b>0</b> | <b>0</b> | <b>0</b>  | <b>8</b>  |
| <i>Cx. (Mel.) vaxus</i>                | 0        | 0        | 0        | -        | 89        | -        | 0        | 0        | 0         | 89        |
| <i>Cx. ocellatus</i>                   | 0        | 13       | 0        | -        | 0         | -        | 0        | 0        | 0         | 13        |
| <i>Hg. (Con.) leucocelaenus</i>        | 0        | 0        | 0        | -        | 0         | -        | 0        | 0        | 0         | 0         |
| <i>Li. durhami</i>                     | 611      | 0        | 0        | -        | 0         | -        | 0        | 0        | 0         | 611       |
| <i>Lu. (Lut.) bigoti</i>               | 6        | 0        | 0        | -        | 0         | -        | 0        | 25       | 0         | 31        |
| <b><i>Ma. (Man.) indubitans</i></b>    | <b>0</b> | <b>0</b> | <b>0</b> | <b>-</b> | <b>3</b>  | <b>-</b> | <b>0</b> | <b>0</b> | <b>0</b>  | <b>3</b>  |
| <b><i>Ps. (Jan.) albigenu</i></b>      | <b>0</b> | <b>0</b> | <b>0</b> | <b>-</b> | <b>0</b>  | <b>-</b> | <b>0</b> | <b>0</b> | <b>2</b>  | <b>2</b>  |
| <i>Ps. (Jan.) ferox</i>                | 0        | 0        | 0        | -        | 3         | -        | 0        | 0        | 11        | 14        |
| <i>Ru. (Run.) cerqueirai</i>           | 0        | 0        | 0        | -        | 0         | -        | 0        | 0        | 0         | 0         |
| <i>Sa. (Sab.) purpureus</i>            | 2        | 0        | 0        | -        | 0         | -        | 5        | 0        | 0         | 7         |
| <i>Sh. fluviatilis</i>                 | 0        | 0        | 0        | -        | 0         | -        | 0        | 0        | 0         | 0         |
| <i>Tr. pallidiventer</i>               | 0        | 0        | 0        | -        | 0         | -        | 0        | 0        | 0         | 0         |
| <b><i>Tx. (Lyn.) portoricensis</i></b> | <b>1</b> | <b>0</b> | <b>0</b> | <b>-</b> | <b>0</b>  | <b>-</b> | <b>0</b> | <b>0</b> | <b>0</b>  | <b>1</b>  |
| <i>Tx. (Lyn.) theobaldi</i>            | 25       | 0        | 0        | -        | 1         | -        | 1        | 0        | 0         | 27        |
| <i>Tx. tricophygus</i>                 | 0        | 0        | 0        | -        | 0         | -        | 0        | 0        | 0         | 0         |
| <i>Ur. (Ura.) geometrica</i>           | 0        | 0        | 0        | -        | 24        | -        | 0        | 0        | 0         | 24        |
| <i>Ur. (Ura.) lowii</i>                | 0        | 0        | 0        | -        | 5         | -        | 0        | 0        | 0         | 5         |
| <b><i>Ur. (Ura.) pulcherrima</i></b>   | <b>0</b> | <b>0</b> | <b>0</b> | <b>-</b> | <b>3</b>  | <b>-</b> | <b>0</b> | <b>0</b> | <b>0</b>  | <b>3</b>  |
| <i>Wy. (Mim.) oblita</i>               | 0        | 0        | 0        | -        | 0         | -        | 0        | 0        | 0         | 0         |
| <i>Wy. (Pho.) davisi</i>               | 1        | 122      | 18       | -        | 0         | -        | 0        | 0        | 0         | 141       |

|                                    |          |           |          |          |          |          |          |          |          |           |
|------------------------------------|----------|-----------|----------|----------|----------|----------|----------|----------|----------|-----------|
| <i>Wy. (Pho.) edwardsi</i>         | 0        | 7         | 2        | -        | 0        | -        | 0        | 0        | 0        | 9         |
| <b><i>Wy. (Pho.) incaudata</i></b> | <b>0</b> | <b>42</b> | <b>1</b> | <b>-</b> | <b>0</b> | <b>-</b> | <b>0</b> | <b>0</b> | <b>0</b> | <b>43</b> |
| <i>Wy. (Pho.) pallidoventer</i>    | 1        | 14        | 0        | -        | 0        | -        | 0        | 0        | 0        | 15        |
| <i>Wy. (Pho.) palmata</i>          | 0        | 12        | 0        | -        | 0        | -        | 0        | 0        | 0        | 12        |
| <b><i>Wy. (Pho.) pilicauda</i></b> | <b>0</b> | <b>14</b> | <b>1</b> | <b>-</b> | <b>0</b> | <b>-</b> | <b>0</b> | <b>0</b> | <b>0</b> | <b>15</b> |
| <b><i>Wy. (Pho.) splendida</i></b> | <b>0</b> | <b>4</b>  | <b>0</b> | <b>-</b> | <b>0</b> | <b>-</b> | <b>0</b> | <b>0</b> | <b>0</b> | <b>0</b>  |
| <i>Wy. (Pho.) theobaldi</i>        | 0        | 138       | 4        | -        | 0        | -        | 0        | 0        | 0        | 142       |
| <i>Wy. (Spi.) airosai</i>          | 0        | 0         | 0        | -        | 0        | -        | 0        | 0        | 0        | 0         |
| <i>Wy. (Wyo.) lutzii</i>           | 0        | 0         | 0        | -        | 0        | -        | 0        | 0        | 0        | 0         |
| <b><i>Wy. aporonoma</i></b>        | <b>0</b> | <b>0</b>  | <b>0</b> | <b>-</b> | <b>0</b> | <b>-</b> | <b>7</b> | <b>0</b> | <b>0</b> | <b>7</b>  |
| <i>Wy. personata</i>               | 0        | 0         | 0        | -        | 0        | -        | 0        | 0        | 0        | 0         |
| <b><i>Wy. serratoria</i></b>       | <b>0</b> | <b>1</b>  | <b>0</b> | <b>-</b> | <b>0</b> | <b>-</b> | <b>0</b> | <b>0</b> | <b>0</b> | <b>1</b>  |
| Total                              | 1849     | 1068      | 304      | 0        | 515      | 0        | 99       | 302      | 338      | 4471      |

**Table S2.** Range of water volume, range of physicochemical parameters and coefficient of variation of different aquatic habitats explored during immature mosquito collections in two remnants of Atlantic Forest in the city of São Paulo, Brazil.

| Area | Aquatic habitat            | Volume (mL)             | pH                     | Conductivity (µS/cm)  | Total dissolved solids | Salinity (psu)         |
|------|----------------------------|-------------------------|------------------------|-----------------------|------------------------|------------------------|
| PEC  | Artificial (N=30)          | 150 - 6000<br>CV:177%   | 4.52 - 8.44<br>CV:19%  | 30 - 639<br>CV:198%   | 15 - 319<br>CV:196%    | 0.01 - 0.31<br>CV:213% |
|      | Epiphytic bromeliad (N=54) | 100 - 1400<br>CV:221%   | 3.70 - 8.42<br>CV:19%  | 10 - 288<br>CV: 266%  | 5 - 144<br>CV:266%     | 0.01 - 0.14<br>CV:289% |
|      | Ground bromeliad (N=2)     | 200 - 450<br>CV:54%     | 5.60 - 8.86<br>CV:20%  | 11 - 192<br>CV:204%   | 05 - 96<br>CV:202%     | 0.01 - 0.09<br>CV:218% |
|      | Bamboo hole (N=4)          | 300 - 450<br>CV:29%     | 4.56 - 6.73<br>CV:20%  | 60 - 557<br>CV:268%   | 30 - 279<br>CV:268%    | 0.03 - 0.27<br>CV:290% |
|      | Lake (N=11)                | 2000 - 12000<br>CV:138% | 5.84 - 8.28<br>CV:19%  | 24 - 77<br>CV:203%    | 12 - 38<br>CV:201%     | 0.01 - 0.04<br>CV:212% |
|      | Tree hollow (N=9)          | 100 - 500<br>CV:42%     | 5.80 - 7.69<br>CV:19%  | 27 - 1560<br>CV:199%  | 13 - 780<br>CV:197%    | 0.01 - 0.78<br>CV:212% |
|      | Bamboo hollow (N=5)        | 200 - 300<br>CV:32%     | 5.21 - 6.89<br>CV:18%  | 188 - 2633<br>CV:203% | 94 - 1316<br>CV:201%   | 0.09 - 1.37<br>CV:216% |
|      | Pond (N=9)                 | 800 - 16000<br>CV:240%  | 4.60 - 6.82<br>CV:19%  | 45 - 265<br>CV:266%   | 23 - 132<br>CV:266%    | 0.02 - 0.12<br>CV:289% |
| APA  | Artificial (N=26)          | 150 - 10000<br>CV:152%  | 3.84 - 10.45<br>CV:19% | 33 - 552<br>CV:258%   | 16 - 276<br>CV:258%    | 0.01 - 0.27<br>CV:281% |
|      | Epiphytic bromeliad (N=62) | 100 - 1000<br>CV:177%   | 3.57 - 5.85<br>CV:19%  | 12 - 749<br>CV:261%   | 6 - 375<br>CV:261%     | 0.00 - 0.36<br>CV:284% |
|      | Ground bromeliad (N=9)     | 200 - 600<br>CV:199%    | 4.15 - 6.02<br>CV:19%  | 25 - 357<br>CV:266%   | 12 - 178<br>CV:266%    | 0.01 - 0.17<br>CV:289% |
|      | Lake (N=22)                | 1200 - 16000<br>CV:160% | 6.1 - 7.62<br>CV:19%   | 51 - 569<br>CV:265%   | 26 - 284<br>CV:265%    | 0.02 - 0.28<br>CV:289% |
|      | Bamboo hollow (N=3)        | 350 - 500<br>CV:200%    | 6.50 - 7.89<br>CV:19%  | 499 - 6147<br>CV:262% | 250 - 3074<br>CV:262%  | 0.24 - 3.31<br>CV:283% |
|      | Rock pond (N=4)            | 1200 - 6000<br>CV:182%  | 6.18 - 6.44<br>CV:18%  | 35 - 224<br>CV:166%   | 17 - 113<br>CV:166%    | 0.01 - 0.11<br>CV:176% |
|      | Pond (N=6)                 | 3000 - 12000<br>CV:193% | 5.99 - 7.49<br>CV:19%  | 38 - 380<br>CV:255%   | 19 - 190<br>CV:255%    | 0.02 - 0.18<br>CV:278% |

CV = Coefficient of variation.
